**Risk factors for suicide following treatment with electroconvulsive therapy:  
A nationwide study of 11,780 patients**

Anders Spanggård BSc<sup>1,2</sup>, Christopher Rohde MD<sup>1,2</sup>, Søren Dinesen Østergaard MD PhD<sup>1,2</sup>

<sup>1</sup>Department of Affective Disorders, Aarhus University Hospital - Psychiatry, Aarhus, Denmark

<sup>2</sup>Department of Clinical Medicine, Aarhus University, Aarhus, Denmark

**Word count: 2751**

**Corresponding author:**

Søren Dinesen Østergaard, MD PhD  
Department of Affective Disorders  
Aarhus University Hospital – Psychiatry  
Palle Juul-Jensens Boulevard 175  
8200 Aarhus N  
Phone: +45 261282753  
Email: soeoes@rm.dk

## ABSTRACT

**Objectives:** Despite the well-established anti-suicidal effect of electroconvulsive therapy (ECT), patients receiving ECT remain at high risk of dying from suicide. In the present study, we aimed to quantify this risk and identify risk factors for suicide among patients receiving ECT.

**Methods:** We used nationwide Danish registers to identify all patients that initiated ECT between 2006 and 2016. These patients were matched on sex and age to 10 reference individuals from the general Danish population. First, we compared 2-year suicide risk between patients initiating ECT and the matched reference individuals. Second, we investigated if any patient characteristics were associated with suicide following ECT via Cox proportional-hazards regression.

**Results:** A total of 11,780 patients receiving ECT and 117,800 reference individuals were included in the analyses. Among the patients receiving ECT, 161 (1.4%) died from suicide within two years. Compared to the reference individuals, patients receiving ECT had a substantially elevated suicide rate (Hazard rate ratio (HRR)=44.5, 95%CI=31.1-63.6). Among those receiving ECT, we identified the following risk factors for suicide: Male sex (HRR=2.3, 95%CI=1.7-3.1), age 60-70 years (HRR=1.6, 95%CI=1.0-2.6), Medium-term higher education (HRR=1.5, 95%CI=1.0-2.2); Long-term higher education (HRR=1.9, 95%CI=1.1-3.1), history of substance use disorder (HRR=2.0, 95%CI=1.4-2.8) and history of intentional self-harm/suicide attempt (HRR=4.0, 95%CI=2.8-5.8).

**Conclusion:** Among patients receiving ECT, those who are male, aged 60-70 years, have medium-term to long-term higher education, or have a history of substance use disorder or intentional self-harm/suicide attempt, are at particularly elevated risk of suicide. These findings may guide initiatives to reduce the risk of suicide.

## KEYWORDS

Electroconvulsive Therapy; Suicide; Depressive Disorder; Substance-Related Disorders; Self-Injurious Behavior

## INTRODUCTION

Electroconvulsive therapy (ECT) is an effective treatment for patients with mental disorders, such as unipolar depression, bipolar disorder, and psychotic disorder that have not responded to other treatments [1, 2]. ECT is also considered a first-line treatment for acute, severe, and potentially life-threatening cases of depression with psychotic symptoms [3], mania [4], catatonia [5], and suicidality [6].

The anti-suicidal effect of ECT across mental disorders is well-established [6-16]. However, because the “baseline” risk of suicide among patients receiving ECT is highly elevated, suicide remains a relatively common cause of death for those having received ECT [17-19]. Despite this fact, there is limited knowledge on which patients that are at particularly elevated risk of suicide following ECT [20]. Such knowledge is essential to establish as it could potentially allow for targeted measures to prevent suicides [21, 22].

One of the reasons why risk factors for suicide following ECT have not been firmly established is likely that, although suicide is relatively common among those receiving ECT, the absolute risk is low. Hence, studying potential risk factors with sufficient power requires larger populations of patients receiving ECT and longer follow-up (without loss to follow-up) than is feasible in most clinical trials. Here, register-based studies may prove helpful due to the availability of nationwide data on ECT and suicides with virtually no loss to follow-up [20, 23]. Therefore, we conducted a study based on nationwide Danish registers to address the following two research questions:

I: How elevated is the risk of suicide among patients receiving ECT compared to the risk of suicide in the general population?

II: Which patient characteristics are associated with suicide following ECT?

## **METHODS**

### ***Data sources***

The study was based on data from the Danish nationwide registers [24]. Specifically, we used data from the Danish Civil Registration System (DCRS) [25], the Danish National Patient Register (DNPATR) [26], the Danish Psychiatric Central Research Register (DPCRR) [27], the Danish National Prescription Registry (DNPreR) [28], the Population Education Register (PER) [29], the Employment Classification Module (ECM) [29], and the Danish Register of Causes of Death (DRCD) [30]. The DCRS contains information on all legal residents in Denmark, such as birth date, sex, vital status, marital status, and the 10-digit personal identification number, which can be used to link information across the nationwide registers [25, 31]. The DPCRR holds data on diagnoses assigned following admissions to Danish psychiatric hospitals since 1970 and following outpatient- and emergency room contacts since 1995 [27]. Since 1994, the International Classification of Diseases, 10<sup>th</sup> edition (ICD-10) [32] has been used as the diagnostic reference in Denmark and hence also in the DPCRR. The DNPATR holds information on ICD-10 diagnoses and treatments from the somatic departments of the Danish hospitals, including data on ECT treatments [26]. The DNPreR holds information on all prescription-based drugs sold at Danish pharmacies since 1995 [28]. The PER holds information on the highest obtained level of education, while the ECM holds data on employment status [29]. The DRCD contains data on the date and cause of death, the latter registered in accordance with the ICD-10 [30].

### ***Identification and clinical/sociodemographic characterization of patients receiving ECT***

We used the DNPATR to identify all patients receiving ECT in Denmark from January 1, 2006, to December 31, 2016. Although data on ECT was registered since 2001, they are considered partly incomplete before 2006 [33, 34]. We used the ECT data from 2005 for “washout” to approximate 1-year incident case status by excluding patients who received ECT in 2005. The diagnostic indication (ICD-10) for the first ECT was retrieved from the DPCRR and the DNPATR and grouped as follows: Organic mental disorder (F0-F9), psychotic disorder (F20-F29), bipolar disorder (F31), unipolar depression (F32-F33), personality disorder (F60-F61) and “other” (any other diagnoses than those mentioned above). For all patients receiving ECT, we retrieved information on any psychiatric diagnoses assigned at Danish psychiatric hospitals in the five years preceding ECT via the DPCRR, grouped as follows: substance use disorder (F10-F19), psychotic disorder (F20-F29), bipolar disorder (F31), unipolar depression (F32-F33), anxiety or neurotic disorder (F40-F48) and

personality disorder (F60-F61). Similarly, we retrieved information from the DNPreR on psychopharmacological treatment in the year preceding ECT (for the Anatomical Therapeutic Chemical (ATC) codes defining the drug categories [35], see Supplementary Table 1). Data on intentional self-harm/suicide attempts (ICD-10 codes X60-X84) for the 5 years preceding ECT were retrieved from the DPCRR and the DNPatR. The DNPatR was used to retrieve information on diagnoses assigned at somatic hospitals pertaining to the Charlson Comorbidity Index (for the ICD-10 codes, see Supplementary Table 1) in the 5 years preceding ECT. Information on marital status (married or registered partnership vs. not being married/living in registered partnership), widowhood (yes/no), highest obtained educational level (primary and lower secondary school, high school/vocational school, short-term higher education, medium-term higher education, long-term higher education), and employment status (employed, unemployed, or outside the labor force) was obtained from the DCRS, PER, and ECM. For marital status, widowhood, and educational level, data from the most recent data update preceding the initiation of ECT was used. For employment status, data from the year preceding the initiation of ECT was used.

### ***Matching to reference individuals from the general population***

We matched each patient receiving ECT on age and sex to 10 reference individuals from the general Danish population. The reference individuals were randomly drawn from the DCRS.

### ***Definition of death (any cause) and suicide***

The DRCD was used to determine the date of death for the patients receiving ECT and the age- and sex-matched reference individuals – and, in the event of death, whether the cause of death was suicide. Suicide was defined by the ICD-10 codes X60-X84 [13, 23, 36].

### ***Follow-up***

The patients receiving ECT were followed from the day of the first ECT treatment until death or two years after receiving ECT, whichever came first. Similarly, the age- and sex-matched reference individuals were followed from the day on which the patient, to whom they were matched, received ECT (matched date) until death, they received ECT, or two years after the matched date, whichever came first.

### ***Statistical analyses***

To answer the two research questions, the following analyses were carried out: First, we compared all-cause mortality- and suicide rates, respectively, between the patients receiving ECT and the age- and sex-matched individuals from the reference group. Specifically, the association between ECT patient status and death/suicide was assessed via Cox proportional hazard regression analyses, yielding hazard rate ratios (HRRs). Second, for the cohort of patients receiving ECT, we examined potential associations between baseline clinical- and sociodemographic characteristics and suicide via unadjusted cox-regression analyses. The following characteristics were examined: sex, age, ECT indication diagnosis, history of mental disorder including substance abuse disorder, history of intentional self-harm/suicide attempt, Charlson comorbidity index, psychopharmacological treatment, marital status, widowhood status, educational level, and employment status. For all Cox proportional hazards regression analyses, the proportional hazards assumption was confirmed by comparing the log-log survival functions. The analyses were conducted using Stata version 15 (StataCorp) via remote access to Statistics Denmark. All tests were 2-sided, and the significance level was set at .05.

#### ***Post-hoc analysis of multiple risk factors for suicide following ECT***

Based on the results of the risk factor analysis described above, we chose to examine the risk of suicide following ECT among patients with the following combinations of characteristics: 1: Male sex + unipolar depression as indication for ECT, 2: Male sex + unipolar depression as indication for ECT + age 50-70 years, 3: Male sex + unipolar depression as indication for ECT + age 50-70 years + medium- or long-term higher education, 4: Male sex + unipolar depression as indication for ECT + age 50-70 years + medium- or long-term higher education + history of substance use disorder, and 5: Male sex + unipolar depression as indication for ECT + age 50-70 years + medium- or long-term higher education + history of substance use disorder + history of intentional self-harm/suicide attempt. The risk for suicide among patients with these characteristics was compared to that of all patients receiving ECT via Cox proportional hazard regression.

#### ***Ethics***

The use of the register-based data for the purpose of this study was approved by the Danish Health Data Authority and Statistics Denmark. No further ethical approval is required for register-based research in Denmark (Waiver from the Central Denmark Region Committees on Health Research Ethics: 1-10-72-1-22). The project is registered with the Danish Data Protection Agency.

## RESULTS

### ***Cohort of patients receiving ECT***

We identified a total of 11,780 patients that initiated ECT. The clinical and sociodemographic characteristics of these patients are listed in Table 1. Their median age was 56.2 years (interquartile range: 42.0-69.7), and 61.5% were women. The most common indication diagnosis for ECT was unipolar depression (61.6%), followed by bipolar disorder (15.8%) and psychotic disorder (11.6%).

*Table 1 approximately here*

### ***2-year suicide- and all-cause mortality rates among ECT patients and matched individuals***

The 11,780 patients were successfully matched on age and sex to 117,800 randomly drawn individuals from the general population (median age=56.2 years (interquartile range 42.0-69.7) and 61.5% women). Table 2 lists the 2-year suicide- and all-cause mortality rates for the ECT group and the age- and sex-matched reference group, respectively. It also lists the HRRs for the association between ECT patient status and suicide and all-cause mortality, respectively. Among the patients receiving ECT, 845 (7.2%) died compared to 3,712 (3.2%) individuals in the reference group, corresponding to a HRR for all-cause mortality of 2.3 (95%CI:2.2-2.5). Among the patients receiving ECT, 161 (1.4%) died from suicide compared to 37 (0.03%) individuals in the reference group, corresponding to a HRR for suicide of 44.5 (95%CI: 31.1-63.6). The time from initiation of ECT to suicide is shown in Figure 1. The cumulative incidence proportion of suicide was 0.6% after 6 months, 1.0% after 1 year, 1.2% after 18 months, and 1.4% after 2 years.

*Table 2 and Figure 1 approximately here*

### ***Risk factors for suicide after ECT***

Table 3 shows the association between the clinical- and sociodemographic baseline characteristics and the risk of suicide among the patients receiving ECT. The following characteristics were both materially and statistically significantly associated with suicide: Male sex (HRR=2.3, 95%CI=1.7-3.1); age 60-70 years (HRR=1.6, 95%CI=1.0-2.6); Medium-term higher education (HRR=1.5, 95%CI=1.0-2.2); Long-term higher education (HRR=1.9, 95%CI=1.1-3.1), having a history of

substance use disorder (HRR=2.0, 95%CI=1.4-2.8), and having a history of intentional self-harm/suicide attempt (HRR=4.0, 95%CI=2.8-5.8).

*Table 3 approximately here*

#### ***Post-hoc analysis of multiple risk factors for suicide following ECT***

The results of the post hoc analysis of having multiple risk factors for suicide are shown in Figure 2. The figure shows a clear dose-response-like relationship between the number of risk factors and the risk of suicide in the two years following ECT. Notably, among male patients aged 50-70 years, having depression as the diagnostic indication for ECT, with medium- or long-term higher education, and a history of substance use disorder, as well as intentional self-harm/suicide attempt, 17% died from suicide in the 2 years following ECT (HRR=12.7, 95%CI:1.8-91.0).

*Figure 2 approximately here*

#### ***Test of proportional hazards***

The proportional hazards assumption was met for all analyses.



## DISCUSSION

In this population-based study, we found that patients receiving ECT have a significantly elevated all-cause- and suicide mortality rate when compared to the general population. Among those receiving ECT, being male, aged 60-70 years, having medium- to long-term higher education, or having a history of substance use disorder or intentional self-harm/suicide attempt was materially and statistically significantly associated with suicide after ECT.

The high mortality- and suicide rate among patients receiving ECT is to be expected considering the severity of the mental disorders treated with ECT [37] and is in line with findings from prior studies [6, 15, 18, 38]. This underlines the need for careful monitoring of this patient population following ECT – with emphasis on the risk of suicide. In this regard, the result on risk factors for suicide following ECT from the present study may be informative for risk-stratified monitoring in clinical practice. The identified risk factors for suicide following ECT overlap with those reported by Brus et al. in their register-based study of suicides among patients with unipolar depression receiving ECT in Sweden [20]. Specifically, Brus et al. found that male sex, substance use disorder, being a widow, or having a history of suicide attempt was positively associated with suicide following ECT [20]. The risk factors identified in the present study are also in line with those reported for suicide in general. Indeed, male sex is among the most consistently reported risk factors for suicide [39, 40], and the same goes for substance use disorder [41, 42], advanced age [43, 44], and prior intentional self-harm/suicide attempts [40, 45]. Notably, all of these risk factors are associated with strong suicidal intent and violent means of suicide. That medium- and long-term higher education was also positively associated with suicide among patients receiving ECT may seem less intuitive and does not match results from studies of risk factors for suicide at the general population level, where higher educational attainment has been found to be a protective factor [46, 47]. The reason for this difference is likely that those with higher education who become sufficiently mentally ill to require ECT may perceive this as a loss of status, which increases the risk of suicide [48-50].

Assuming that the identified risk factors may aid in identifying patients at particularly elevated risk of suicide following ECT, how should that information then be used in clinical practice to reduce the number of suicides? Employing a systematic protocol combining monitoring of suicide risk (e.g., via regular telephone follow-up [51, 52]), identification and reduction of access to lethal

means [21, 40], and appropriate follow-up by outpatient psychiatric services, potentially including specific counseling/therapy for those previously having attempted suicide [53], would seem reasonable in this regard. Ideally, such a protocol should be tailored to the ECT population and tested in a randomized controlled trial.

There may also be psychopharmacological means of reducing the risk of suicide following ECT. For depression treated with ECT, lithium may reduce the risk of relapse of depression and suicide [20]. This is in line with a large body of literature strongly suggesting that lithium has general anti-suicidal properties [54], in particular in the treatment of bipolar disorder [55, 56]. Considering that 77.3% of the patients in the present study received ECT for unipolar depression or bipolar disorder and that only 11.2% of the patients had received lithium in the year leading up to the ECT treatment, lithium could be considered as a treatment option for a quite large proportion of ECT recipients. Furthermore, gradual tapering of ECT, combined with pharmacotherapy, may be preferable to more abrupt transition from ECT to pharmacotherapy [57].

There are limitations to this study, which should be taken into account by its readers. First and foremost, it is important to note that this study is register-based – with the pros and cons this involves. The pros include the large and “real-world” representative sample as well as the long follow-up for deaths, including suicides. The cons include the somewhat lacking clinical phenotyping – besides the diagnostic indication for ECT. Specifically, the registers do not contain information on the psychopathological status of the patients before, during, and following an ECT treatment course (from rating scales, etc.). Furthermore, the diagnoses assigned to the patients stem from standard clinical practice and are not necessarily supported by research-based/standardized assessments. The validity of the diagnoses in the Danish registers is, however, considered to be high and sufficient for research purposes [58-60]. Relatedly, although the validity of data from the Danish Cause of Death Register is also considered to be quite high [30], some suicides are most likely misclassified as accidents. Finally, Denmark is among the countries where ECT is used the most [61]. It follows that the results of the present study may not necessarily generalize to other countries where ECT is used to a lesser degree and/or for other clinical indications. However, given the fact that the identified risk factors for suicide following ECT are quite consistent with those known from global suicide research, the generalizability is likely substantial.

We find that patients treated with ECT are at highly elevated risk of suicide compared with sex- and age-matched individuals from the general population. Among patients receiving ECT, those who are male, 60-70 years, have medium-term to long-term higher education, or have a history of substance abuse or intentional self-harm/suicide attempt are at particularly elevated risk. Careful risk assessment and follow-up of patients with these characteristics may reduce the rate of suicide in this high-risk group.

## **ACKNOWLEDGEMENTS**

CR had full access to all the data in the study and takes responsibility for the integrity of the data and the accuracy of the data analysis.

## **CONTRIBUTORS**

The study was designed by all authors. SDØ procured the data. The statistical analyses were carried out by CR. All authors contributed to the interpretation of the results. AS and SDØ wrote the initial draft of the manuscript, which was subsequently revised for important intellectual content by CR. All authors approved the final version of the manuscript prior to submission.

## **DATA SHARING**

The data used for this study cannot be shared according to Danish Law. Access to the data can be achieved upon application to Statistics Denmark and the Danish Health Data Authority.

## **FUNDING**

There was no direct funding of this study. CR is supported by the Danish Diabetes Academy, funded by the Novo Nordisk Foundation (grant number NNF17SA0031406), and the Lundbeck Foundation (grant number R358-2020-2342). SDØ is supported by the Novo Nordisk Foundation (grant number: NNF20SA0062874), the Lundbeck Foundation (grant numbers: R358-2020-2341 and R344-2020-1073), the Danish Cancer Society (grant number: R283-A16461), the Central Denmark Region Fund for Strengthening of Health Science (grant number: 1-36-72-4-20), The

Danish Agency for Digitisation Investment Fund for New Technologies (grant number 2020–6720), and Independent Research Fund Denmark (grant number: 7016-00048B). The funding sources had no role in the design and conduct of the study; collection, management, analysis, and interpretation of the data; preparation, review, or approval of the manuscript; and decision to submit the manuscript for publication.

## **CONFLICTS OF INTEREST**

CR received the 2020 Lundbeck Foundation Talent Prize. SDØ received the 2020 Lundbeck Foundation Young Investigator Prize. Furthermore, SDØ owns/has owned units of mutual funds with stock tickers DKIGI, IAIMWC and WEKAFKI, and has owned units of exchange traded funds with stock tickers BATE, TRET, QDV5, QDVH, QDVE, SADM, IQQH, USPY, EXH2, 2B76 and EUNL. The remaining authors report no conflicts of interest.

## REFERENCES

1. Munk-Olsen, T., et al., *All-cause mortality among recipients of electroconvulsive therapy: register-based cohort study*. Br J Psychiatry, 2007. **190**: p. 435-9.
2. Kellner, C.H., J. Obbels, and P. Sienaert, *When to consider electroconvulsive therapy (ECT)*. Acta Psychiatr Scand, 2020. **141**(4): p. 304-315.
3. Leadholm, A.K., et al., *The treatment of psychotic depression: is there consensus among guidelines and psychiatrists?* J Affect Disord, 2013. **145**(2): p. 214-20.
4. Elias, A., N. Thomas, and H.A. Sackeim, *Electroconvulsive Therapy in Mania: A Review of 80 Years of Clinical Experience*. Am J Psychiatry, 2021. **178**(3): p. 229-239.
5. Sienaert, P., *What we have learned about electroconvulsive therapy and its relevance for the practising psychiatrist*. Can J Psychiatry, 2011. **56**(1): p. 5-12.
6. Rönnqvist, I., F.K. Nilsson, and A. Nordenskjöld, *Electroconvulsive Therapy and the Risk of Suicide in Hospitalized Patients With Major Depressive Disorder*. JAMA Netw Open, 2021. **4**(7): p. e2116589.
7. Fink, M., C.H. Kellner, and W.V. McCall, *The role of ECT in suicide prevention*. J ect, 2014. **30**(1): p. 5-9.
8. Sienaert, P., et al., *Suicidal ideation and ECT, ECT and suicidal ideation: a register study*. Acta Psychiatr Scand, 2022.
9. Liang, C.S., et al., *Superior anti-suicidal effects of electroconvulsive therapy in unipolar disorder and bipolar depression*. Bipolar Disord, 2018. **20**(6): p. 539-546.
10. Watts, B.V., T. Peltzman, and B. Shiner, *Mortality after electroconvulsive therapy*. Br J Psychiatry, 2021. **219**(5): p. 588-593.
11. Pagnin, D., et al., *Efficacy of ECT in depression: a meta-analytic review*. J ect, 2004. **20**(1): p. 13-20.
12. Perugi, G., et al., *The Role of Electroconvulsive Therapy (ECT) in Bipolar Disorder: Effectiveness in 522 Patients with Bipolar Depression, Mixed-state, Mania and Catatonic Features*. Curr Neuropharmacol, 2017. **15**(3): p. 359-371.
13. Salagre, E., C. Rohde, and S.D. Østergaard, *Self-Harm and Suicide Attempts Preceding and Following Electroconvulsive Therapy: A Population-Based Study*. J ect, 2022. **38**(1): p. 13-23.
14. Kellner, C.H., et al., *Relief of expressed suicidal intent by ECT: a consortium for research in ECT study*. Am J Psychiatry, 2005. **162**(5): p. 977-82.
15. Rhee, T.G., et al., *Association of ECT With Risks of All-Cause Mortality and Suicide in Older Medicare Patients*. Am J Psychiatry, 2021. **178**(12): p. 1089-1097.
16. Kaster, T.S., et al., *Risk of suicide death following electroconvulsive therapy treatment for depression: a propensity score-weighted, retrospective cohort study in Canada*. Lancet Psychiatry, 2022. **9**(6): p. 435-446.
17. Dennis, N.M., et al., *Electroconvulsive Therapy and All-Cause Mortality in Texas, 1998-2013*. J ect, 2017. **33**(1): p. 22-25.
18. Peltzman, T., B. Shiner, and B.V. Watts, *Effects of Electroconvulsive Therapy on Short-Term Suicide Mortality in a Risk-Matched Patient Population*. J ect, 2020. **36**(3): p. 187-192.
19. Watts, B.V., T. Peltzman, and B. Shiner, *Electroconvulsive Therapy and Death by Suicide*. J Clin Psychiatry, 2022. **83**(3).
20. Brus, O., et al., *Lithium for suicide and readmission prevention after electroconvulsive therapy for unipolar depression: population-based register study*. BJPsych Open, 2019. **5**(3): p. e46.
21. Stanley, B., et al., *Comparison of the Safety Planning Intervention With Follow-up vs Usual Care of Suicidal Patients Treated in the Emergency Department*. JAMA Psychiatry, 2018. **75**(9): p. 894-900.
22. Fox, K.R., et al., *Interventions for suicide and self-injury: A meta-analysis of randomized controlled trials across nearly 50 years of research*. Psychol Bull, 2020. **146**(12): p. 1117-1145.
23. Leadholm, A.K., et al., *Risk factors for suicide among 34,671 patients with psychotic and non-psychotic severe depression*. Journal of affective disorders, 2014. **156**: p. 119-125.
24. Munk-Jorgensen, P. and S.D. Ostergaard, *Register-based studies of mental disorders*. Scand J Public Health, 2011. **39**(7): p. 170-174.

25. Pedersen, C.B., *The danish civil registration system*. Scandinavian Journal of Public Health, 2011. **39**(7 Suppl): p. 22-25.
26. Lyng, E., J.L. Sandegaard, and M. Rebolj, *The Danish National Patient Register*. Scand J Public Health, 2011. **39**(7 Suppl): p. 30-3.
27. Mors, O., G.P. Perto, and P.B. Mortensen, *The Danish Psychiatric Central Research Register*. Scand J Public Health, 2011. **39**(7 Suppl): p. 54-7.
28. Kildemoes, H.W., H.T. Sørensen, and J. Hallas, *The Danish National Prescription Registry*. Scand J Public Health, 2011. **39**(7 Suppl): p. 38-41.
29. Thygesen, L.C., et al., *Introduction to Danish (nationwide) registers on health and social issues: structure, access, legislation, and archiving*. Scandinavian Journal of Public Health, 2011. **39**(7 Suppl): p. 12-16.
30. Helweg-Larsen, K., *The Danish Register of Causes of Death*. Scand J Public Health, 2011. **39**(7 Suppl): p. 26-9.
31. Frank, L., *Epidemiology. When an entire country is a cohort*. Science (New York, N.Y.), 2000. **287**(5462): p. 2398-2399.
32. World Health, O., *The ICD-10 Classification of Mental and Behavioural Disorders. Diagnostic criteria for research*. WHO. Geneva. 1993.
33. Hundrup, E., M. Osler, and M.B. Jørgensen, *Time Trends and Variations in Electroconvulsive Treatment in Denmark 2008 to 2014: A Nationwide Register-Based Study*. J ect, 2017. **33**(4): p. 243-248.
34. Osler, M., et al., *Mortality and acute somatic events following electroconvulsive therapy in patients with pre-existing somatic comorbidity - A register-based nationwide Danish cohort study*. World J Biol Psychiatry, 2021: p. 1-9.
35. World Health, O., *The Anatomical Therapeutic Chemical (ATC) classification system* ([www.whocc.no/atc](http://www.whocc.no/atc)). 2014.
36. Qin, P. and M. Nordentoft, *Suicide risk in relation to psychiatric hospitalization: evidence based on longitudinal registers*. Archives of General Psychiatry, 2005. **62**(4): p. 427-432.
37. Nordentoft, M., P.B. Mortensen, and C.B. Pedersen, *Absolute risk of suicide after first hospital contact in mental disorder*. Archives of General Psychiatry, 2011. **68**(10): p. 1058-1064.
38. Jørgensen, M.B., et al., *Electroconvulsive therapy, depression severity and mortality: Data from the Danish National Patient Registry*. J Psychopharmacol, 2020. **34**(3): p. 273-279.
39. Hawton, K., *Sex and suicide. Gender differences in suicidal behaviour*. Br J Psychiatry, 2000. **177**: p. 484-5.
40. Olfson, M., et al., *Suicide Following Deliberate Self-Harm*. The American Journal of Psychiatry, 2017. **174**(8): p. 765-774.
41. Yuodelis-Flores, C. and R.K. Ries, *Addiction and suicide: A review*. Am J Addict, 2015. **24**(2): p. 98-104.
42. Sørensen, E.H., M.V. Thorgaard, and S.D. Østergaard, *Male depressive traits in relation to violent suicides or suicide attempts: A systematic review*. J Affect Disord, 2020. **262**: p. 55-61.
43. Shah, A., *The relationship between suicide rates and age: an analysis of multinational data from the World Health Organization*. Int Psychogeriatr, 2007. **19**(6): p. 1141-52.
44. De Leo, D. and K. Spathonis, *Suicide and euthanasia in late life*. Aging Clin Exp Res, 2003. **15**(2): p. 99-110.
45. Bostwick, J.M., et al., *Suicide Attempt as a Risk Factor for Completed Suicide: Even More Lethal Than We Knew*. Am J Psychiatry, 2016. **173**(11): p. 1094-1100.
46. Phillips, J.A. and K. Hempstead, *Differences in U.S. Suicide Rates by Educational Attainment, 2000-2014*. Am J Prev Med, 2017. **53**(4): p. e123-e130.
47. Øien-Ødegaard, C., L.J. Hauge, and A. Reneflot, *Marital status, educational attainment, and suicide risk: a Norwegian register-based population study*. Popul Health Metr, 2021. **19**(1): p. 33.
48. Qin, P., et al., *Gender differences in risk factors for suicide in Denmark*. Br J Psychiatry, 2000. **177**: p. 546-50.

49. Dombrowski, A.Y., et al., *Losing the battle: Perceived status loss and contemplated or attempted suicide in older adults*. *Int J Geriatr Psychiatry*, 2018. **33**(7): p. 907-914.
50. Coope, C., et al., *Characteristics of people dying by suicide after job loss, financial difficulties and other economic stressors during a period of recession (2010-2011): A review of coroners' records*. *J Affect Disord*, 2015. **183**: p. 98-105.
51. Exbrayat, S., et al., *Effect of telephone follow-up on repeated suicide attempt in patients discharged from an emergency psychiatry department: a controlled study*. *BMC Psychiatry*, 2017. **17**(1): p. 96.
52. Vaiva, G., et al., *Effect of telephone contact on further suicide attempts in patients discharged from an emergency department: randomised controlled study*. *Bmj*, 2006. **332**(7552): p. 1241-5.
53. Gysin-Maillart, A., et al., *A Novel Brief Therapy for Patients Who Attempt Suicide: A 24-months Follow-Up Randomized Controlled Study of the Attempted Suicide Short Intervention Program (ASSIP)*. *PLoS Med*, 2016. **13**(3): p. e1001968.
54. Wilkinson, S.T., et al., *Pharmacological and somatic treatment effects on suicide in adults: A systematic review and meta-analysis*. *Depress Anxiety*, 2022. **39**(2): p. 100-112.
55. Jepsen, O.H., et al., *Real-world effectiveness of mood stabilizers on self-harm and suicide attempts in patients with bipolar disorder: A 2-year mirror-image study*. *Journal of Affective Disorders Reports*, 2021. **3**: p. 100064.
56. Cipriani, A., et al., *Lithium in the prevention of suicide in mood disorders: updated systematic review and meta-analysis*. *Bmj*, 2013. **346**: p. f3646.
57. Kellner, C.H., et al., *A Novel Strategy for Continuation ECT in Geriatric Depression: Phase 2 of the PRIDE Study*. *Am J Psychiatry*, 2016. **173**(11): p. 1110-1118.
58. Uggerby, P., et al., *The validity of the schizophrenia diagnosis in the Danish Psychiatric Central Research Register is good*. *Danish medical journal*, 2013. **60**(2): p. A4578.
59. Bock, C., et al., *Validity of the diagnosis of a single depressive episode in a case register*. *Clinical practice and epidemiology in mental health : CP & EMH*, 2009. **5**: p. 4.
60. Kessing, L., *Validity of diagnoses and other clinical register data in patients with affective disorder*. *European psychiatry : the journal of the Association of European Psychiatrists*, 1998. **13**(8): p. 392-398.
61. Leiknes, K.A., L. Jarosh-von Schweder, and B. Høie, *Contemporary use and practice of electroconvulsive therapy worldwide*. *Brain Behav*, 2012. **2**(3): p. 283-344.

## TABLES

**Table 1. Characteristics of individuals initiating ECT**

|                                                    | <b>Individuals initiating ECT (n=11,780)</b> |
|----------------------------------------------------|----------------------------------------------|
| <b>Females</b>                                     | 7,243 (61.5%)                                |
| <b>Age, median years (interquartile range)</b>     | 56.2 (42.0-69.7)                             |
| <b>Indication diagnosis for first ECT, n (%):</b>  |                                              |
| Organic mental disorder                            | 415 (3.5%)                                   |
| Psychotic disorder                                 | 1,363 (11.6%)                                |
| Bipolar disorder                                   | 1,857 (15.8%)                                |
| Unipolar depression                                | 7,253 (61.6%)                                |
| Personality disorder                               | 162 (1.4%)                                   |
| Other                                              | 730 (6.2%)                                   |
| <b>History of mental disorder, n (%)</b>           |                                              |
| Psychotic disorder                                 | 2,281 (19.4%)                                |
| Bipolar disorder                                   | 2,412 (20.5%)                                |
| Unipolar depression                                | 8,952 (76%)                                  |
| Anxiety disorder                                   | 3,601 (30.6%)                                |
| Personality disorder                               | 1,379 (11.7%)                                |
| <b>History of substance use disorder, n (%)</b>    | 2,095 (17.8%)                                |
| <b>History of suicide attempt/self-harm, n (%)</b> | 790 (6.7%)                                   |
| <b>Charlson comorbidity index, n (%)</b>           |                                              |
| 0                                                  | 8,704 (73.9%)                                |
| 1                                                  | 2,059 (17.5%)                                |
| ≥2                                                 | 1,017 (8.6%)                                 |
| <b>Psychopharmacological treatment, n (%)</b>      |                                              |
| Any antidepressant                                 | 9,188 (78.0%)                                |
| SSRI                                               | 5,652 (48.0%)                                |
| SNRI                                               | 3,314 (28.1%)                                |
| TCA                                                | 1,969 (16.7%)                                |
| Antipsychotics                                     | 6,104 (51.8%)                                |
| Lithium                                            | 1,320 (11.2%)                                |
| Sedatives                                          | 7,291 (61.9%)                                |
| <b>Marital status, n (%)</b>                       |                                              |
| Married/registered partnership                     | 4,800 (40.7%)                                |
| Not married/registered partnership                 | 6,973 (59.2%)                                |
| Missing                                            | 7 (0.6%)                                     |
| <b>Widowhood, n (%)</b>                            | 1,475 (12.5%)                                |
| <b>Educational level, n (%)</b>                    |                                              |
| Primary and lower secondary school                 | 4,317 (36.6%)                                |
| High school/vocational school                      | 4,428 (37.6%)                                |
| Short-term higher education                        | 321 (2.7%)                                   |
| Medium-term higher education                       | 1,733 (14.7%)                                |
| Long-term higher education                         | 665 (5.6%)                                   |
| Missing                                            | 316 (2.7%)                                   |
| <b>Employment status, n (%)</b>                    |                                              |
| Employed                                           | 2,894 (24.6%)                                |
| Unemployed                                         | 2,247 (19.1%)                                |
| Outside the labor force                            | 6,628 (56.3%)                                |
| Missing                                            | 11 (0.1%)                                    |



**Table 2. All-cause mortality and suicide risk for individuals receiving ECT compared to sex- and age-matched individuals from the general population**

|                                  | <b>Number of events<br/>n (%)</b> | <b>Rate of suicides per 1000<br/>years of follow-up<br/>(95%CI)</b> | <b>Unadjusted hazard rate<br/>ratio<br/>(95%CI)</b> |
|----------------------------------|-----------------------------------|---------------------------------------------------------------------|-----------------------------------------------------|
| <b>All-cause mortality</b>       |                                   |                                                                     |                                                     |
| ECT treated patients             | 845 (7.2%)                        | 37.4 (35.0-40.0)                                                    | 2.3 (2.2-2.5)                                       |
| Sex- and age-matched individuals | 3,712 (3.2%)                      | 16.0 (15.5-16.6)                                                    | 1.00 (ref.)                                         |
|                                  |                                   |                                                                     |                                                     |
| <b>Suicide</b>                   |                                   |                                                                     |                                                     |
| ECT treated patients             | 161 (1.4%)                        | 7.1 (6.1-8.3)                                                       | 44.5 (31.1-63.6)                                    |
| Sex- and age-matched individuals | 37 (0.0%)                         | 0.2 (0.1-0.2)                                                       | 1.00 (ref.)                                         |

\* All individuals were followed from the date of first ECT or matched date (for control individuals) until two years after start of follow-up, death, first ECT (for the sex- and age-matched individuals), whichever came first.

**Table 3. Risk factors for suicide among individuals initiating ECT**

|                                             |                                    | <b>HRR suicide</b>          |
|---------------------------------------------|------------------------------------|-----------------------------|
| <b>Sex</b>                                  |                                    |                             |
|                                             | Female                             | 1.0 (ref.)                  |
|                                             | Male                               | 2.3 (1.7-3.1)               |
| <b>Age categories</b>                       |                                    |                             |
|                                             | <40                                | 1.0 (ref.)                  |
|                                             | ≥40-50                             | 1.2 (0.7-2.1)               |
|                                             | ≥50-60                             | 1.6 (1.0-2.6)*              |
|                                             | ≥60-70                             | 1.6 (1.0-2.6)**             |
|                                             | ≥70                                | 0.9 (0.5-1.5)               |
| <b>Indication diagnosis for first ECT</b>   |                                    |                             |
|                                             | Organic mental disorder            | 0.4 (0.1-1.6)               |
|                                             | Psychotic disorder                 | 1.0 (0.6-1.6)               |
|                                             | Bipolar disorder                   | 0.5 (0.3-0.9)               |
|                                             | Unipolar depression                | 1.4 (1.0-1.9)***            |
|                                             | Personality disorder               | 1.8 (0.7-4.9)               |
| <b>History of mental disorder</b>           |                                    |                             |
|                                             | Psychotic disorder                 | 0.9 (0.6-1.4)               |
|                                             | Bipolar disorder                   | 0.8 (0.5-1.2)               |
|                                             | Unipolar depression                | 1.3 (0.9-1.9)               |
|                                             | Anxiety disorder                   | 1.3 (0.9-1.8)               |
|                                             | Personality disorder               | 1.1 (0.7-1.7)               |
| <b>History of substance use disorder</b>    |                                    | 2.0 (1.4-2.8)               |
| <b>History of suicide attempt/self-harm</b> |                                    | 4.0 (2.8-5.8)               |
| <b>Charlson comorbidity index</b>           |                                    |                             |
|                                             | 0                                  | 1.0 (ref.)                  |
|                                             | 1                                  | 1.0 (0.6-1.5)               |
|                                             | ≥2                                 | 1.0 (0.6-1.8)               |
| <b>Psychopharmacological treatment</b>      |                                    |                             |
|                                             | Any antidepressant                 | 1.0 (0.7-1.5)               |
|                                             | SSRI                               | 1.3 (1.0-1.8) <sup>#</sup>  |
|                                             | SNRI                               | 0.9 (0.6-1.3)               |
|                                             | TCA                                | 0.9 (0.6-1.3)               |
|                                             | Antipsychotics                     | 0.8 (0.6-1.1)               |
|                                             | Lithium                            | 0.8 (0.5-1.4)               |
|                                             | Sedatives                          | 1.0 (0.7-1.4)               |
| <b>Marital status</b>                       |                                    |                             |
|                                             | Married/registered partnership     | 0.8 (0.6-1.1)               |
|                                             | Not married/registered partnership | 1.2 (0.9-1.7)               |
| <b>Widowhood, n (%)</b>                     |                                    | 1.2 (0.7-1.8)               |
| <b>Educational level</b>                    |                                    |                             |
|                                             | Primary and lower secondary school | 0.5 (0.3-0.7)               |
|                                             | High school/vocational school      | 1.2 (0.9-1.7)               |
|                                             | Short-term higher education        | 0.4 (0.1-1.8)               |
|                                             | Medium-term higher education       | 1.5 (1.0-2.2) <sup>##</sup> |
|                                             | Long-term higher education         | 1.8 (1.1-3.1)               |
| <b>Employment status</b>                    |                                    |                             |
|                                             | Employed                           | 1.3 (0.9-1.8)               |
|                                             | Unemployed                         | 0.8 (0.5-1.2)               |
|                                             | Outside the labor force            | 0.9 (0.7-1.3)               |

\*95% CI: 0.99-2.58, \*\*95% CI: 1.01-2.64, \*\*\*95% CI: 0.98-1.92, <sup>#</sup>95% CI: 0.99-1.84, <sup>##</sup>95% CI: 1.01-2.18.

## **FIGURE LEGENDS**

**Figure 1. Aalen-Johansen curve showing the crude cumulative incidence of suicide among patients receiving ECT**

**Figure 2. Estimates of 2-year suicide risk after ECT for patients with multiple risk factors**

**Figure 1. Aalen-Johansen curve showing the crude cumulative incidence of suicide among patients receiving ECT**

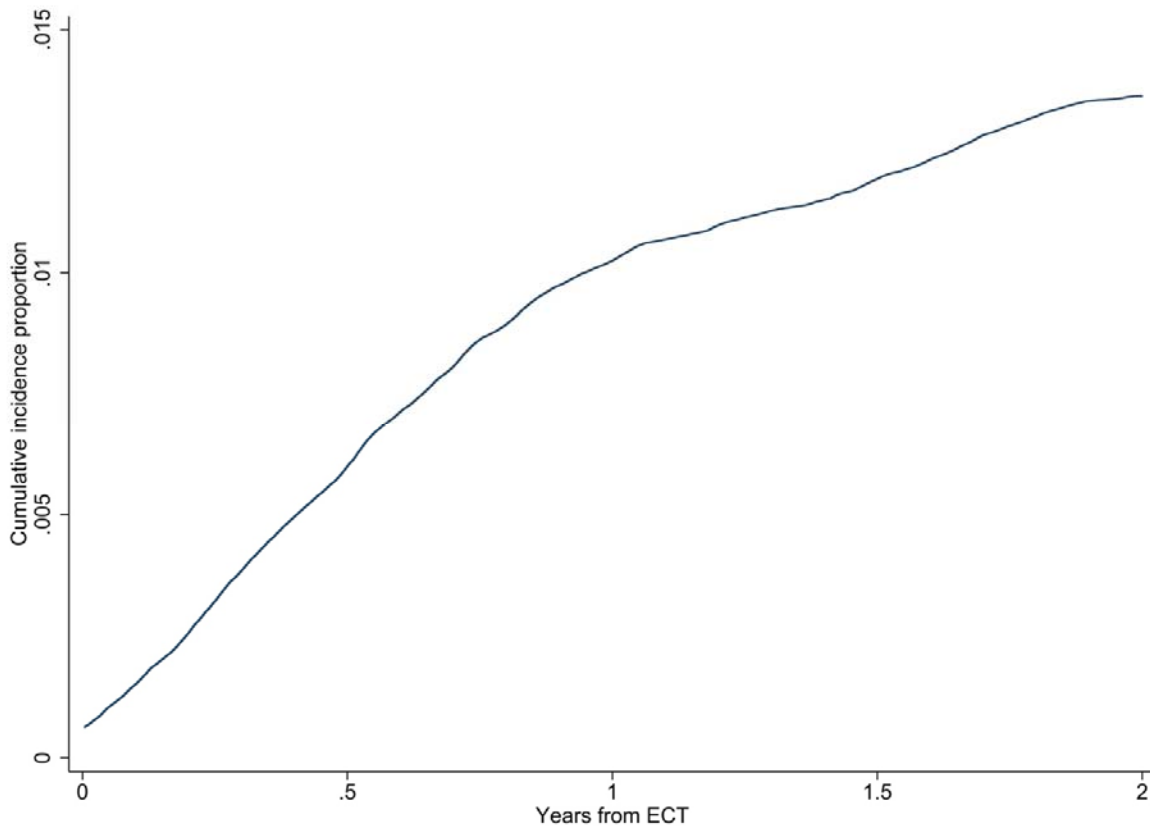

**Figure 2.** Estimates of 2-year suicide risk after ECT for patients with multiple risk factors

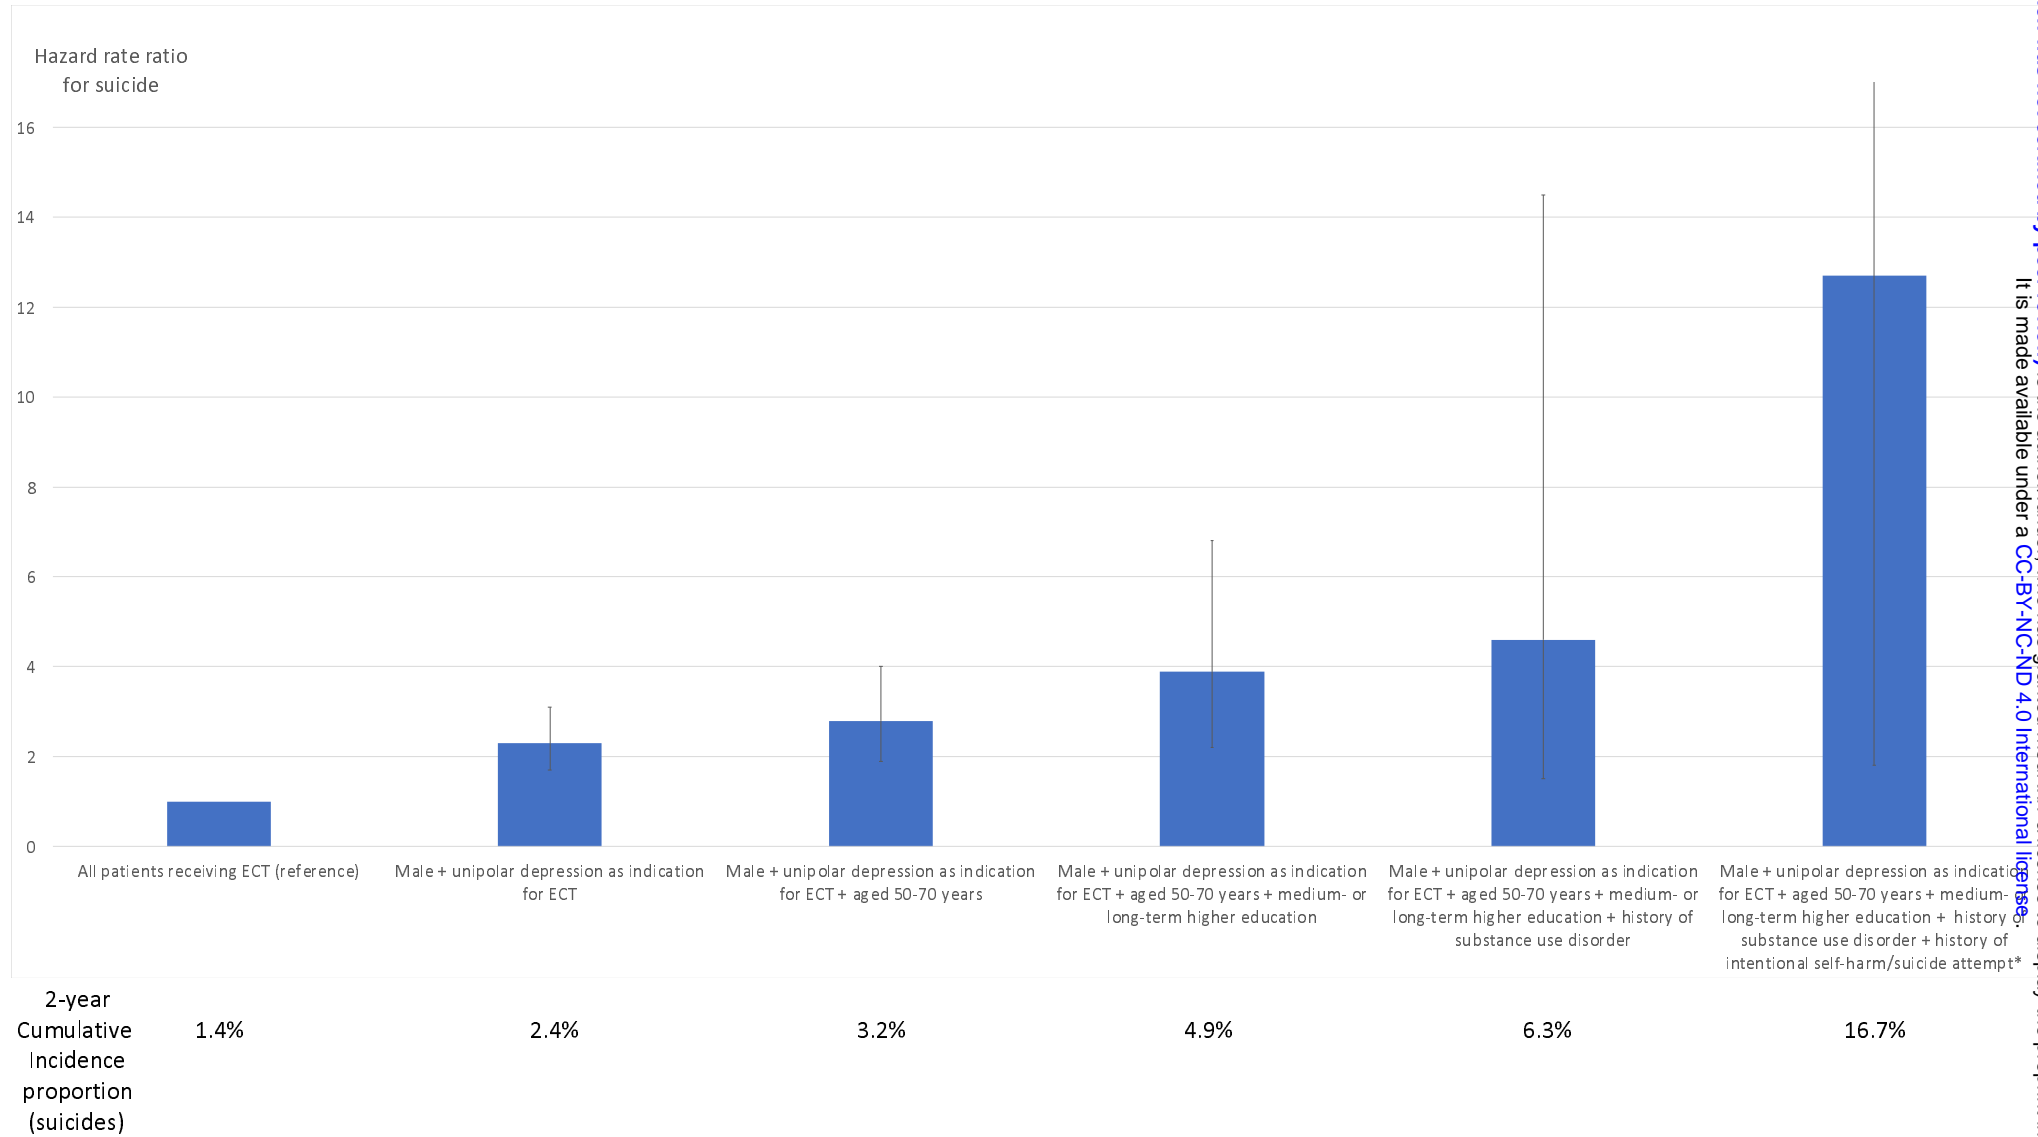

\* The upper 95% confidence interval (91.0) has been truncated.
